# Supplementary material
Source: MDPI journal article supplement (https://www.mdpi.com/2311-5637/8/1/26)
Supplement: s1 [file s1 › fermentation-1545312-supplementary.pdf]

# Immobilization of *Aspergillus oryzae* DSM 1863 for L-malic acid production

## Supplementary material

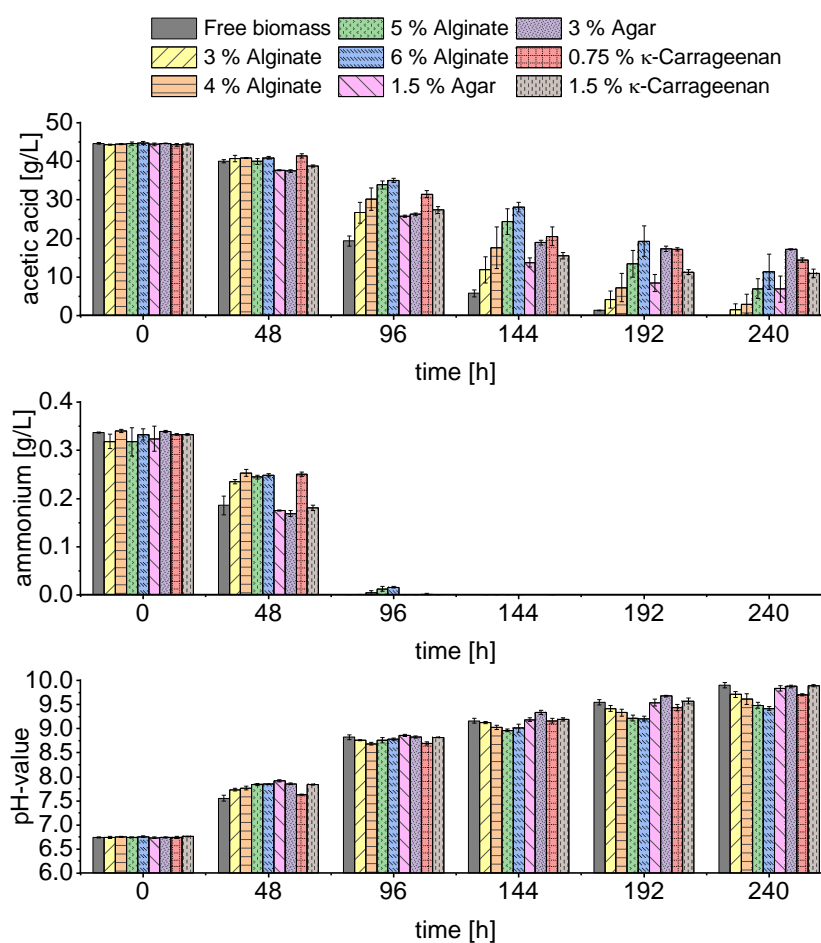

**Figure S1.** Acetic acid and ammonium concentration as well as progression of the pH value for shake flask experiments using acetate as carbon source. Values are means of triplicates with standard deviation.

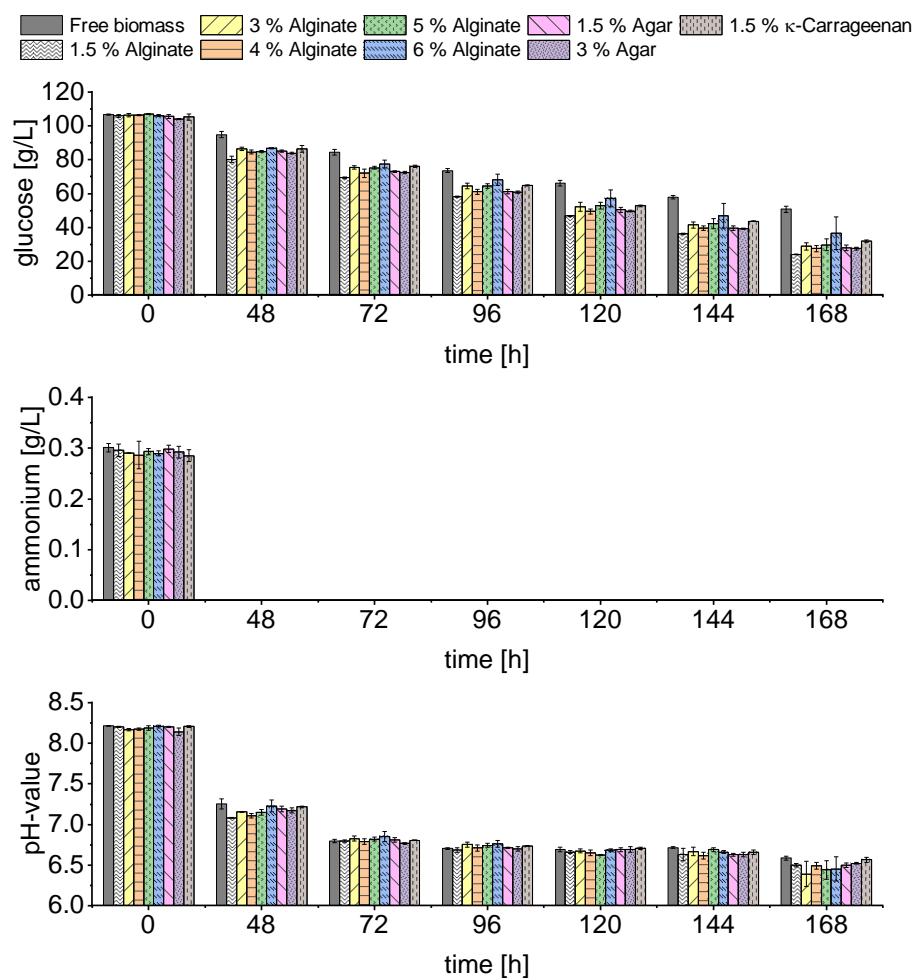

**Figure S2.** Glucose and ammonium concentration as well as progression of the pH value for shake flask experiments using glucose as carbon source. Values are means of triplicates with standard deviation.

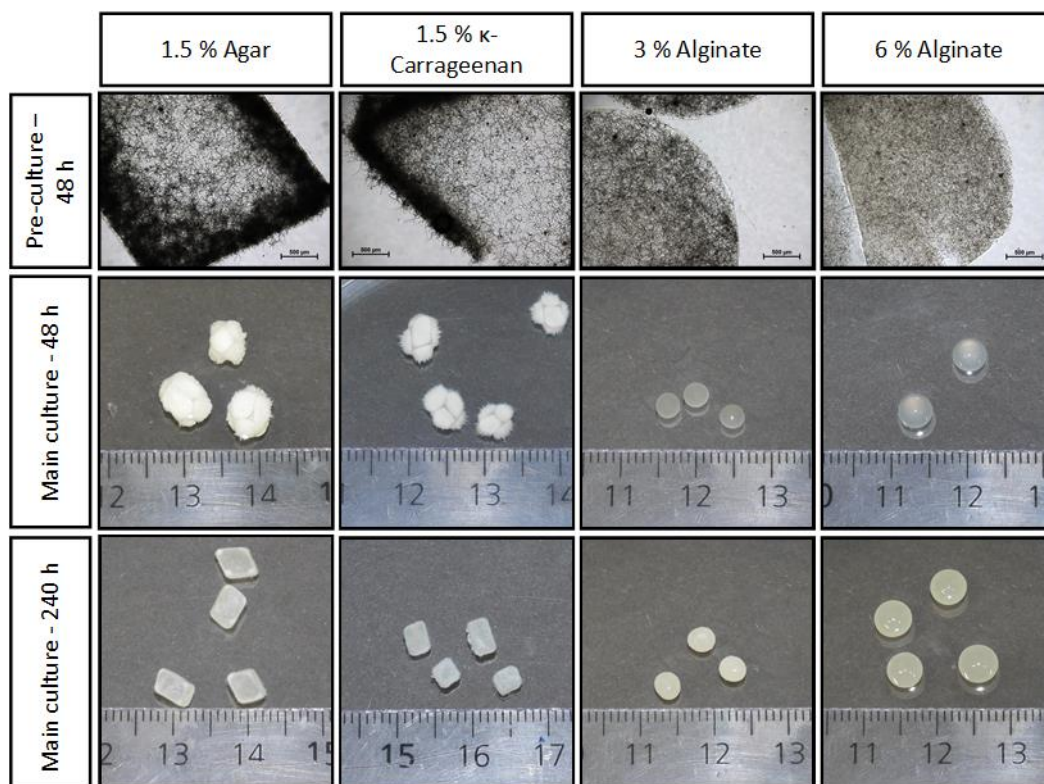

**Figure S3.** *A. oryzae* immobilized in different matrices in the pre- and main culture. The preculture was grown without carbon source in the medium while the main culture medium contained acetate.

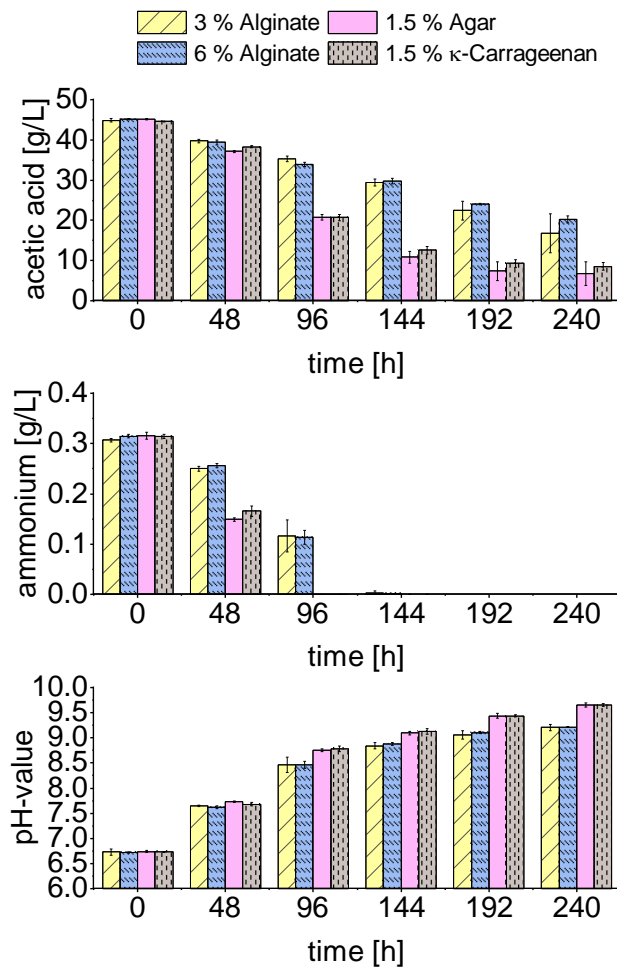

**Figure S4.** Acetic acid and ammonium concentration as well as progression of the pH value for main culture shake flask experiments using immobilized *A. oryzae* grown without external carbon source in the preculture. Values are means of triplicates with standard deviation.
